# Supplementary material for: Shortening Epitopes to Survive: The Case of SARS-CoV-2 Lambda Variant
Source: MDPI journal article supplement (doi:10.3390/biom11101494), 2021-10-10
Supplement: s1 [file s1]

**Table S1.** Variation of binding energy of the residues at the interface between NTD and 4A8 calculated by DrugScore<sup>PPI</sup> alanine scanning.

|                    | Reference                      | Lambda                         | Delta                          |
|--------------------|--------------------------------|--------------------------------|--------------------------------|
| Interface residues | $\Delta\Delta G$<br>(kcal/mol) | $\Delta\Delta G$<br>(kcal/mol) | $\Delta\Delta G$<br>(kcal/mol) |
| V143               | 0.18                           | 0.19                           | 0.18                           |
| Y144               | 0.30                           | 0.37                           | 0.31                           |
| Y145               | 1.64                           | 1.73                           | 1.70                           |
| H146               | 0.06                           | 0.07                           | 0.01                           |
| K147               | 1.67                           | 1.64                           | 1.67                           |
| N148               | 0.33                           | 0.33                           | 0.33                           |
| K150               | 0.60                           | 0.72                           | 0.72                           |
| S151               | 0.13                           | 0.13                           | 0.21                           |
| W152               | 1.73                           | 1.72                           | 1.57                           |
| R158               | 0.09                           | 0.07                           | $\Delta$                       |
| H245               | 0.13                           | 0.06                           | 0.16                           |
| R246               | 1.20                           | $\Delta$                       | 1.81                           |
| S247               | 0.15                           | $\Delta$                       | 0.13                           |
| Y248               | 2.96                           | $\Delta$                       | 3.06                           |
| L249               | 1.16                           | 1.16                           | 1.09                           |
| T250               | 0.16                           | 0.16                           | 0.13                           |
| S256               | 0.09                           | 0.09                           | 0.09                           |

**Table S2.** Epitope prediction. Sequence position of the discontinuous epitopes predicted for the wild type, the Lambda and Delta variant NTDs.

| <b>Reference<sup>a</sup></b> |         | <b>Lambda<sup>a</sup></b> |         | <b>Delta<sup>a</sup></b> |         |
|------------------------------|---------|---------------------------|---------|--------------------------|---------|
| DiscoTope                    | BePro   | DiscoTope                 | BePro   | DiscoTope                | BePro   |
| X                            | 23-25   | X                         | 23-25   | X                        | 22-26   |
| 71-74                        | 71-73   | 72-74                     | 72-73   | 71-75                    | 71-73   |
| 146-151                      | 146-153 | 146-151                   | 146-153 | 146-151                  | 146-152 |
| X                            | 173-176 | X                         | 173-176 | X                        | 171-174 |
| 181-185                      | 182-187 | 182-184                   | 182-187 | 180-184                  | 180-185 |
| X                            | 209-213 | X                         | 211-213 | X                        | 207-211 |
| 247-252                      | 248-252 | X                         | X       | 247-252                  | 246-252 |

<sup>a</sup> X means not predicted as epitope

**Table S3.** PRODIGY prediction of interaction energy between ACE2 and Spike Receptor Binding Domain (RBD) of Reference, Lambda and Delta variants

| RBD       | $\Delta G$ (kcal/mol) | $K_d$ (M) at 25°C   | No of interface contacts <sup>a</sup> |
|-----------|-----------------------|---------------------|---------------------------------------|
| Reference | -11.9                 | $1.9 \cdot 10^{-9}$ | 66                                    |
| Lambda    | -12.1                 | $1.4 \cdot 10^{-9}$ | 66                                    |
| Delta     | -11.9                 | $1.9 \cdot 10^{-9}$ | 66                                    |

<sup>a</sup> Overall number of contacts between residues from RBD and ACE2. These contacts include different type of interactions such as electrostatic, van der Walls, polar, and the like.
